# Supplementary material for: Influence of CO2 Degassing on the Microbial Community in a Dry Mofette Field in Hartoušov, Czech Republic (Western Eger Rift)
Source: Front Microbiol. 2018 Nov 21;9:2787. doi: 10.3389/fmicb.2018.02787 (PMC6258768; doi:10.3389/fmicb.2018.02787)
Supplement: Supplementary file 8 [file Data_Sheet_8.CSV]

Taxon	Av. dissim	Contrib. %	Cumulative %	mean_mofette	mean_reference site
D_0__Bacteria;D_1__Acidobacteria;D_2__Acidobacteria;D_3__Acidobacteriales;D_4__Acidobacteriaceae (Subgroup 1);D_5__uncultured	5.052	7.474	7.474	0.173	0.116
D_0__Bacteria;D_1__Proteobacteria;D_2__Gammaproteobacteria;D_3__Acidithiobacillales;D_4__Acidithiobacillaceae;D_5__Acidithiobacillus	4.612	6.824	14.3	0.0974	0.00513
D_0__Bacteria;D_1__Proteobacteria;D_2__Deltaproteobacteria;D_3__Myxococcales;D_4__bacteriap25;D_5__uncultured bacterium	2.334	3.453	17.75	0.0492	0.00256
Unassigned;Other;Other;Other;Other;Other	1.782	2.636	20.39	0.0441	0.00841
D_0__Bacteria;D_1__Acidobacteria;D_2__Subgroup 2;Other;Other;Other	1.61	2.383	22.77	0.00319	0.0354
D_0__Bacteria;D_1__Chloroflexi;D_2__Ktedonobacteria;D_3__Ktedonobacterales;D_4__HSB OF53-F07;D_5__uncultured bacterium	1.543	2.282	25.05	0.00191	0.0328
D_0__Bacteria;D_1__Chloroflexi;D_2__Anaerolineae;D_3__Anaerolineales;D_4__Anaerolineaceae;D_5__uncultured	1.5	2.218	27.27	0.00565	0.0356
D_0__Bacteria;D_1__Acidobacteria;D_2__Acidobacteria;D_3__Acidobacteriales;D_4__Acidobacteriaceae (Subgroup 1);D_5__Terriglobus	1.318	1.95	29.22	0.0278	0.00141
D_0__Bacteria;D_1__Firmicutes;D_2__Bacilli;D_3__Bacillales;D_4__Bacillaceae;D_5__Bacillus	1.312	1.941	31.16	0.0367	0.0105
D_0__Bacteria;D_1__Ignavibacteriae;D_2__Ignavibacteria;D_3__Ignavibacteriales;D_4__BSV26;D_5__uncultured bacterium	0.987	1.46	32.62	0.0217	0.00195
D_0__Bacteria;D_1__Verrucomicrobia;D_2__Spartobacteria;D_3__Chthoniobacterales;D_4__DA101 soil group;D_5__uncultured bacterium	0.8959	1.325	33.95	0.00139	0.0193
D_0__Bacteria;D_1__Chloroflexi;D_2__JG37-AG-4;D_3__uncultured bacterium;D_4__uncultured bacterium;D_5__uncultured bacterium	0.8897	1.316	35.26	0.0253	0.0105
D_0__Bacteria;D_1__Acidobacteria;D_2__Subgroup 2;D_3__uncultured bacterium;D_4__uncultured bacterium;D_5__uncultured bacterium	0.8116	1.201	36.46	0.00145	0.0177
D_0__Bacteria;D_1__Actinobacteria;D_2__Acidimicrobiia;D_3__Acidimicrobiales;D_4__uncultured;D_5__uncultured bacterium	0.7934	1.174	37.64	0.0186	0.00277
D_0__Bacteria;D_1__Proteobacteria;D_2__Alphaproteobacteria;D_3__Rhizobiales;D_4__Xanthobacteraceae;D_5__Variibacter	0.7903	1.169	38.81	0.00168	0.0175
D_0__Bacteria;D_1__Acidobacteria;D_2__Holophagae;D_3__Subgroup 7;D_4__uncultured bacterium;D_5__uncultured bacterium	0.7901	1.169	39.98	0.00116	0.017
D_0__Bacteria;D_1__Firmicutes;D_2__Clostridia;D_3__Clostridiales;D_4__Clostridiaceae 1;D_5__Clostridium sensu stricto 13	0.78	1.154	41.13	0.0204	0.00479
D_0__Bacteria;D_1__Proteobacteria;D_2__Betaproteobacteria;Other;Other;Other	0.7653	1.132	42.26	0.0012	0.0164
D_0__Bacteria;D_1__Actinobacteria;D_2__Actinobacteria;D_3__Frankiales;D_4__Acidothermaceae;D_5__Acidothermus	0.7574	1.121	43.38	0.0112	0.0231
D_0__Bacteria;D_1__Chloroflexi;D_2__KD4-96;D_3__uncultured bacterium;D_4__uncultured bacterium;D_5__uncultured bacterium	0.7557	1.118	44.5	0.0216	0.00661
D_0__Bacteria;D_1__Proteobacteria;D_2__Deltaproteobacteria;D_3__Desulfurellales;D_4__Desulfurellaceae;D_5__H16	0.7478	1.106	45.61	0.01	0.024
D_0__Bacteria;D_1__Proteobacteria;D_2__Deltaproteobacteria;D_3__Bdellovibrionales;D_4__Bacteriovoracaceae;D_5__uncultured	0.7456	1.103	46.71	0.0157	0.000747
D_0__Bacteria;D_1__Chloroflexi;D_2__Ktedonobacteria;D_3__Ktedonobacterales;D_4__JG30a-KF-32;D_5__uncultured bacterium	0.7392	1.094	47.8	0.000861	0.0156
D_0__Bacteria;D_1__Acidobacteria;D_2__Solibacteres;D_3__Solibacterales;D_4__Solibacteraceae (Subgroup 3);D_5__Bryobacter	0.739	1.093	48.9	0.00141	0.0162
D_0__Bacteria;D_1__Proteobacteria;D_2__Deltaproteobacteria;D_3__Syntrophobacterales;D_4__Syntrophaceae;D_5__Desulfobacca	0.7174	1.061	49.96	0.0185	0.00651
D_0__Bacteria;D_1__Proteobacteria;D_2__Alphaproteobacteria;D_3__Rhizobiales;D_4__Bradyrhizobiaceae;D_5__Bradyrhizobium	0.7168	1.06	51.02	0.00166	0.016
D_0__Bacteria;D_1__Nitrospirae;D_2__Nitrospira;D_3__Nitrospirales;D_4__FW13;Other	0.7127	1.054	52.07	0.00112	0.0153
D_0__Bacteria;D_1__Proteobacteria;D_2__Betaproteobacteria;D_3__Hydrogenophilales;D_4__Hydrogenophilaceae;D_5__Sulfuriferula	0.7039	1.041	53.11	0.0148	0.000722
D_0__Bacteria;D_1__Chloroflexi;D_2__Ktedonobacteria;D_3__Ktedonobacterales;D_4__HSB OF53-F07;Other	0.6475	0.958	54.07	0.000849	0.0138
D_0__Bacteria;D_1__Proteobacteria;D_2__Betaproteobacteria;D_3__Nitrosomonadales;D_4__Gallionellaceae;D_5__Sideroxydans	0.5959	0.8816	54.95	0.002	0.0139
D_0__Bacteria;D_1__Acidobacteria;D_2__Solibacteres;D_3__Solibacterales;D_4__Solibacteraceae (Subgroup 3);D_5__Candidatus Solibacter	0.5854	0.866	55.82	0.00422	0.0159
D_0__Bacteria;D_1__Proteobacteria;D_2__Betaproteobacteria;D_3__Nitrosomonadales;D_4__Nitrosomonadaceae;D_5__uncultured	0.5847	0.865	56.68	0.00126	0.013
D_0__Bacteria;D_1__Proteobacteria;D_2__Alphaproteobacteria;D_3__Rhodospirillales;D_4__Acetobacteraceae;D_5__Acidiphilium	0.5654	0.8365	57.52	0.0121	0.000815
D_0__Bacteria;D_1__Actinobacteria;D_2__Acidimicrobiia;D_3__Acidimicrobiales;D_4__uncultured;Other	0.5569	0.8238	58.35	0.0133	0.00216
D_0__Bacteria;D_1__Actinobacteria;D_2__Thermoleophilia;D_3__Gaiellales;D_4__uncultured;D_5__uncultured bacterium	0.5344	0.7906	59.14	0.00734	0.0139
D_0__Bacteria;D_1__Planctomycetes;D_2__Planctomycetacia;D_3__Planctomycetales;D_4__Planctomycetaceae;D_5__uncultured	0.525	0.7767	59.91	0.0149	0.0101
D_0__Bacteria;D_1__Chloroflexi;D_2__Ktedonobacteria;D_3__JG30-KF-AS9;D_4__uncultured bacterium;D_5__uncultured bacterium	0.5224	0.7728	60.69	0.00102	0.0115
D_0__Bacteria;D_1__Proteobacteria;D_2__Deltaproteobacteria;D_3__Sva0485;D_4__uncultured bacterium;D_5__uncultured bacterium	0.4856	0.7184	61.4	0.000752	0.0104
D_0__Bacteria;D_1__Acidobacteria;D_2__Subgroup 2;D_3__uncultured Acidobacteria bacterium;D_4__uncultured Acidobacteria bacterium;D_5__uncultured Acidobacteria bacterium	0.4787	0.7082	62.11	0.000706	0.0103
D_0__Bacteria;D_1__Proteobacteria;D_2__Betaproteobacteria;D_3__Ferrovales;D_4__Ferrovaceae;D_5__Ferrovum	0.4757	0.7037	62.82	0.01	0.000526
D_0__Bacteria;D_1__Nitrospirae;D_2__Nitrospira;D_3__Nitrospirales;D_4__Sh765B-TzT-35;D_5__uncultured bacterium	0.4642	0.6868	63.5	0.000822	0.01
D_0__Bacteria;D_1__Firmicutes;D_2__Clostridia;D_3__Clostridiales;D_4__Clostridiaceae 1;D_5__Clostridium sensu stricto 9	0.4635	0.6857	64.19	0.0104	0.0011
D_0__Bacteria;D_1__Firmicutes;D_2__Clostridia;D_3__Clostridiales;D_4__Peptococcaceae;D_5__Desulfosporosinus	0.4459	0.6597	64.85	0.0101	0.00121
D_0__Bacteria;D_1__Verrucomicrobia;D_2__OPB35 soil group;D_3__uncultured bacterium;D_4__uncultured bacterium;D_5__uncultured bacterium	0.4381	0.6482	65.5	0.00513	0.0138
D_0__Bacteria;D_1__Planctomycetes;D_2__Phycisphaerae;D_3__CPla-3 termite group;D_4__uncultured bacterium;D_5__uncultured bacterium	0.4333	0.6411	66.14	0.00901	0.000372
D_0__Bacteria;D_1__Actinobacteria;D_2__Thermoleophilia;D_3__Solirubrobacterales;Other;Other	0.4242	0.6276	66.76	0.00982	0.00143
D_0__Bacteria;D_1__Firmicutes;D_2__Clostridia;D_3__Clostridiales;D_4__Lachnospiraceae;D_5__Mobilitalea	0.4036	0.5971	67.36	0.00885	0.000778
D_0__Bacteria;D_1__Acidobacteria;D_2__Holophagae;D_3__Subgroup 7;Other;Other	0.3855	0.5704	67.93	0.000569	0.00828
D_0__Bacteria;D_1__Acidobacteria;D_2__Holophagae;D_3__Holophagae Incertae Sedis;D_4__Unknown Family;D_5__Thermoanaerobaculum	0.3842	0.5685	68.5	0.00954	0.00187
D_0__Bacteria;D_1__Proteobacteria;D_2__Alphaproteobacteria;D_3__Rhodospirillales;D_4__Acetobacteraceae;D_5__uncultured	0.3818	0.5648	69.07	0.0122	0.00723
D_0__Bacteria;D_1__Firmicutes;D_2__Clostridia;D_3__Clostridiales;D_4__Peptostreptococcaceae;D_5__Peptoclostridium	0.3704	0.548	69.61	0.00779	0.000382
D_0__Bacteria;D_1__Acidobacteria;D_2__Subgroup 6;D_3__uncultured bacterium;D_4__uncultured bacterium;D_5__uncultured bacterium	0.3655	0.5407	70.15	0.000607	0.00792
D_0__Bacteria;D_1__Proteobacteria;D_2__Alphaproteobacteria;D_3__Rhizobiales;D_4__Rhizobiales Incertae Sedis;D_5__Rhizomicrobium	0.3524	0.5213	70.68	0.000596	0.00764
D_0__Bacteria;D_1__Gemmatimonadetes;D_2__Gemmatimonadetes;D_3__Gemmatimonadales;D_4__Gemmatimonadaceae;D_5__uncultured	0.3459	0.5117	71.19	0.000628	0.00755
D_0__Bacteria;D_1__Acidobacteria;D_2__Subgroup 13;D_3__uncultured bacterium;D_4__uncultured bacterium;D_5__uncultured bacterium	0.3156	0.4669	71.65	0.0029	0.00883
D_0__Bacteria;D_1__Firmicutes;D_2__Clostridia;D_3__Clostridiales;D_4__Ruminococcaceae;D_5__Ruminiclostridium 1	0.3026	0.4477	72.1	0.00673	0.00068
D_0__Bacteria;D_1__Proteobacteria;D_2__Alphaproteobacteria;D_3__Rhizobiales;D_4__Xanthobacteraceae;Other	0.2928	0.4332	72.53	0.000509	0.00636
D_0__Bacteria;D_1__Ignavibacteriae;D_2__Ignavibacteria;D_3__Ignavibacteriales;D_4__LD-RB-34;Other	0.2926	0.4329	72.97	0.00614	0.000291
D_0__Bacteria;D_1__Chloroflexi;D_2__Ktedonobacteria;D_3__Ktedonobacterales;D_4__FCPS473;Other	0.2922	0.4323	73.4	0.000386	0.00622
D_0__Bacteria;D_1__Chloroflexi;D_2__S085;D_3__uncultured bacterium;D_4__uncultured bacterium;D_5__uncultured bacterium	0.2917	0.4316	73.83	0.000363	0.0062
D_0__Bacteria;D_1__Gemmatimonadetes;D_2__Gemmatimonadetes;D_3__Gemmatimonadales;D_4__Gemmatimonadaceae;D_5__Gemmatimonas	0.2816	0.4167	74.25	0.00053	0.00616
D_0__Archaea;D_1__Bathyarchaeota;D_2__uncultured archaeon;D_3__uncultured archaeon;D_4__uncultured archaeon;D_5__uncultured archaeon	0.2746	0.4062	74.65	0.0025	0.00659
D_0__Bacteria;D_1__Actinobacteria;D_2__Thermoleophilia;D_3__Gaiellales;D_4__uncultured;Ambiguous_taxa	0.2723	0.4028	75.06	0.000847	0.00627
D_0__Bacteria;D_1__Proteobacteria;D_2__Gammaproteobacteria;D_3__Xanthomonadales;D_4__Xanthomonadaceae;D_5__Metallibacterium	0.27	0.3994	75.46	0.00564	0.000257
D_0__Bacteria;D_1__Acidobacteria;D_2__Holophagae;D_3__TPD-58;D_4__uncultured bacterium;D_5__uncultured bacterium	0.2652	0.3923	75.85	0.00578	0.000474
D_0__Bacteria;D_1__Firmicutes;D_2__Clostridia;D_3__Clostridiales;D_4__Clostridiaceae 1;D_5__Clostridium sensu stricto 1	0.2591	0.3833	76.23	0.0067	0.00152
D_0__Archaea;D_1__Thaumarchaeota;D_2__FHMa11 terrestrial group;Other;Other;Other	0.2584	0.3823	76.61	0.000302	0.00546
D_0__Bacteria;D_1__Nitrospirae;D_2__Nitrospira;D_3__Nitrospirales;D_4__0319-6A21;Other	0.2432	0.3598	76.97	0.000395	0.00522
D_0__Bacteria;D_1__Proteobacteria;D_2__Deltaproteobacteria;D_3__Desulfuromonadales;D_4__Geobacteraceae;D_5__Geobacter	0.2362	0.3495	77.32	0.000414	0.00514
D_0__Bacteria;D_1__Chloroflexi;D_2__SBR2076;Other;Other;Other	0.2341	0.3464	77.67	0.000658	0.00516
D_0__Bacteria;D_1__Firmicutes;D_2__Clostridia;D_3__Clostridiales;D_4__Family XVII;D_5__Sulfobacillus	0.2296	0.3396	78.01	0.00485	0.000254
D_0__Bacteria;D_1__Chloroflexi;D_2__Ktedonobacteria;D_3__Ktedonobacterales;D_4__FCPS473;D_5__uncultured Ktedobacteria bacterium	0.218	0.3226	78.33	0.00027	0.00463
D_0__Bacteria;D_1__Proteobacteria;D_2__Deltaproteobacteria;D_3__Myxococcales;D_4__Archangiaceae;D_5__Anaeromyxobacter	0.2163	0.3201	78.65	0.000342	0.00463
D_0__Bacteria;D_1__Planctomycetes;D_2__Planctomycetacia;D_3__Planctomycetales;D_4__Planctomycetaceae;D_5__Isosphaera	0.2119	0.3136	78.97	0.00107	0.00517
D_0__Bacteria;D_1__Firmicutes;D_2__Clostridia;D_3__Clostridiales;D_4__Heliobacteriaceae;D_5__Hydrogenispora	0.2081	0.3079	79.27	0.00521	0.00114
D_0__Bacteria;D_1__Acidobacteria;D_2__Acidobacteria;D_3__Acidobacteriales;D_4__Acidobacteriaceae (Subgroup 1);D_5__Candidatus Koribacter	0.202	0.2988	79.57	0.00246	0.0061
D_0__Bacteria;D_1__Proteobacteria;D_2__Betaproteobacteria;D_3__SC-I-84;Ambiguous_taxa;Ambiguous_taxa	0.2014	0.298	79.87	0.000355	0.00438
D_0__Bacteria;D_1__Chloroflexi;D_2__KD4-96;Ambiguous_taxa;Ambiguous_taxa;Ambiguous_taxa	0.2014	0.2979	80.17	0.00784	0.0074
D_0__Bacteria;D_1__Proteobacteria;D_2__Alphaproteobacteria;D_3__Rhizobiales;D_4__Rhodobiaceae;D_5__uncultured	0.2009	0.2972	80.47	0.000444	0.00446
D_0__Bacteria;D_1__Acidobacteria;D_2__Subgroup 6;Ambiguous_taxa;Ambiguous_taxa;Ambiguous_taxa	0.1871	0.2769	80.74	0.000292	0.00404
D_0__Bacteria;D_1__Firmicutes;D_2__Clostridia;D_3__Clostridiales;D_4__Clostridiaceae 1;D_5__Oxobacter	0.1859	0.275	81.02	0.00394	0.000223
D_0__Bacteria;D_1__Proteobacteria;D_2__Betaproteobacteria;D_3__SC-I-84;Other;Other	0.1834	0.2713	81.29	0.000375	0.00404
D_0__Bacteria;D_1__Actinobacteria;D_2__Actinobacteria;D_3__Micrococcales;D_4__Micrococcaceae;D_5__Pseudarthrobacter	0.1808	0.2675	81.56	0.0003	0.00392
D_0__Bacteria;D_1__Latescibacteria;D_2__uncultured bacterium;D_3__uncultured bacterium;D_4__uncultured bacterium;D_5__uncultured bacterium	0.1804	0.2669	81.82	0.000261	0.00387
D_0__Bacteria;D_1__Proteobacteria;D_2__Gammaproteobacteria;D_3__Xanthomonadales;D_4__uncultured;D_5__uncultured bacterium	0.1774	0.2625	82.09	0.000448	0.00399
D_0__Bacteria;D_1__Verrucomicrobia;D_2__OPB35 soil group;Other;Other;Other	0.1766	0.2612	82.35	0.000487	0.00402
D_0__Bacteria;D_1__Chloroflexi;D_2__TK10;D_3__uncultured bacterium;D_4__uncultured bacterium;D_5__uncultured bacterium	0.1712	0.2532	82.6	0.000564	0.00399
D_0__Bacteria;D_1__Nitrospirae;D_2__Nitrospira;D_3__Nitrospirales;D_4__FW13;D_5__uncultured bacterium	0.1675	0.2478	82.85	0.00559	0.00328
D_0__Bacteria;D_1__Actinobacteria;D_2__Thermoleophilia;D_3__Solirubrobacterales;D_4__YNPFFP1;D_5__uncultured bacterium	0.1665	0.2464	83.09	0.000951	0.0042
D_0__Bacteria;D_1__Nitrospirae;D_2__Nitrospira;D_3__Nitrospirales;D_4__0319-6A21;D_5__uncultured bacterium	0.1643	0.2431	83.34	0.000234	0.00351
D_0__Bacteria;D_1__Bacteroidetes;D_2__Sphingobacteriia;D_3__Sphingobacteriales;D_4__Chitinophagaceae;D_5__uncultured	0.1642	0.2429	83.58	0.000345	0.00362
D_0__Bacteria;D_1__Firmicutes;D_2__Clostridia;D_3__Clostridiales;D_4__Family XVII;D_5__uncultured	0.162	0.2396	83.82	0.00341	0.000169
D_0__Archaea;D_1__Euryarchaeota;D_2__Thermoplasmata;D_3__Thermoplasmatales;D_4__ASC21;D_5__uncultured archaeon	0.1599	0.2366	84.06	0.000122	0.00327
D_0__Bacteria;D_1__Acidobacteria;D_2__Subgroup 2;Ambiguous_taxa;Ambiguous_taxa;Ambiguous_taxa	0.1543	0.2282	84.29	0.000301	0.00339
D_0__Bacteria;D_1__Firmicutes;D_2__Bacilli;D_3__Bacillales;D_4__Planococcaceae;Other	0.1533	0.2268	84.51	0.00499	0.00195
D_0__Bacteria;D_1__Firmicutes;D_2__Clostridia;D_3__Clostridiales;D_4__Clostridiaceae 1;D_5__Clostridium sensu stricto 12	0.1515	0.2241	84.74	0.00362	0.000599
D_0__Bacteria;D_1__Chloroflexi;D_2__Anaerolineae;D_3__Anaerolineales;D_4__Anaerolineaceae;D_5__Leptolinea	0.1481	0.2191	84.95	0.000542	0.00342
D_0__Bacteria;D_1__Actinobacteria;D_2__Thermoleophilia;D_3__Solirubrobacterales;D_4__TM146;Other	0.1438	0.2127	85.17	0.00054	0.00341
D_0__Bacteria;D_1__Firmicutes;D_2__Clostridia;D_3__Clostridiales;D_4__Clostridiaceae 1;D_5__Fonticella	0.1434	0.2121	85.38	0.00329	0.000425
D_0__Bacteria;D_1__Chloroflexi;D_2__JG30-KF-CM66;D_3__uncultured bacterium;D_4__uncultured bacterium;D_5__uncultured bacterium	0.1421	0.2102	85.59	0.00535	0.00355
D_0__Bacteria;D_1__Proteobacteria;D_2__Alphaproteobacteria;D_3__Rhodospirillales;D_4__DA111;D_5__uncultured bacterium	0.1335	0.1976	85.79	0.000268	0.00294
D_0__Bacteria;D_1__Acidobacteria;D_2__Subgroup 15;D_3__uncultured bacterium;D_4__uncultured bacterium;D_5__uncultured bacterium	0.1333	0.1972	85.98	0.000234	0.0029
D_0__Bacteria;D_1__Proteobacteria;D_2__Alphaproteobacteria;D_3__Rhizobiales;D_4__Roseiarcaceae;D_5__Roseiarcus	0.1266	0.1874	86.17	0.000438	0.00296
D_0__Bacteria;D_1__Proteobacteria;D_2__Epsilonproteobacteria;D_3__Campylobacterales;D_4__Helicobacteraceae;D_5__Sulfurovum	0.1251	0.185	86.36	0.00316	0.000821
D_0__Bacteria;D_1__Actinobacteria;D_2__Actinobacteria;D_3__Micrococcales;D_4__Micrococcaceae;D_5__Arthrobacter	0.1229	0.1818	86.54	0.000162	0.00262
D_0__Bacteria;D_1__Actinobacteria;D_2__Acidimicrobiia;D_3__Acidimicrobiales;D_4__Acidimicrobiaceae;D_5__Ferrithrix	0.1211	0.1792	86.72	0.00255	0.000123
D_0__Bacteria;D_1__Planctomycetes;D_2__Planctomycetacia;D_3__Planctomycetales;D_4__Planctomycetaceae;D_5__Planctomyces	0.1207	0.1786	86.9	0.000215	0.00263
D_0__Bacteria;D_1__Nitrospirae;D_2__Nitrospira;D_3__Nitrospirales;D_4__Nitrospiraceae;D_5__uncultured	0.1155	0.1708	87.07	0.00282	0.00201
D_0__Bacteria;D_1__Actinobacteria;D_2__Acidimicrobiia;D_3__Acidimicrobiales;D_4__uncultured;Ambiguous_taxa	0.1123	0.1662	87.23	0.00368	0.00308
D_0__Bacteria;D_1__Chloroflexi;D_2__Ktedonobacteria;D_3__Ktedonobacterales;D_4__BacC-u-018;D_5__uncultured bacterium	0.1119	0.1656	87.4	0.000131	0.00235
D_0__Bacteria;D_1__Spirochaetae;D_2__Spirochaetes;D_3__Spirochaetales;D_4__Spirochaetaceae;D_5__Spirochaeta 2	0.1103	0.1632	87.56	0.00135	0.00284
D_0__Bacteria;D_1__Chloroflexi;D_2__Anaerolineae;D_3__Anaerolineales;D_4__Anaerolineaceae;D_5__Anaerolinea	0.11	0.1627	87.73	0.00013	0.00233
D_0__Bacteria;D_1__Caldiserica;D_2__Caldisericia;D_3__Caldisericales;D_4__Caldisericaceae;D_5__Caldisericum	0.1085	0.1605	87.89	0.00368	0.00163
D_0__Archaea;D_1__Thaumarchaeota;D_2__South African Gold Mine Gp 1(SAGMCG-1);D_3__uncultured archaeon;D_4__uncultured archaeon;D_5__uncultured archaeon	0.1082	0.16	88.05	0.00177	0.00256
D_0__Bacteria;D_1__Acidobacteria;D_2__Subgroup 13;Ambiguous_taxa;Ambiguous_taxa;Ambiguous_taxa	0.1077	0.1594	88.21	0.000174	0.00233
D_0__Bacteria;D_1__Chloroflexi;D_2__Ktedonobacteria;D_3__Ktedonobacterales;D_4__G12-WMSP1;Other	0.107	0.1583	88.36	0.000124	0.00225
D_0__Bacteria;D_1__Proteobacteria;D_2__Alphaproteobacteria;D_3__Rhizobiales;D_4__KF-JG30-B3;D_5__uncultured bacterium	0.1029	0.1523	88.52	0.000142	0.0022
D_0__Bacteria;D_1__Chloroflexi;D_2__SBR2076;D_3__uncultured bacterium;D_4__uncultured bacterium;D_5__uncultured bacterium	0.1003	0.1484	88.66	0.000131	0.00213
D_0__Bacteria;D_1__Proteobacteria;D_2__Gammaproteobacteria;D_3__Acidiferrobacterales;D_4__Acidiferrobacteraceae;D_5__Sulfurifustis	0.09936	0.147	88.81	0.000155	0.00214
D_0__Bacteria;D_1__Firmicutes;D_2__Clostridia;D_3__Halanaerobiales;D_4__ODP1230B8.23;D_5__uncultured bacterium	0.09683	0.1433	88.95	0.000684	0.00251
D_0__Bacteria;D_1__Proteobacteria;D_2__Alphaproteobacteria;D_3__Rhodospirillales;D_4__DA111;Other	0.09486	0.1403	89.09	0.000235	0.00213
D_0__Bacteria;D_1__Proteobacteria;D_2__Alphaproteobacteria;D_3__Rhizobiales;D_4__Xanthobacteraceae;D_5__Pseudolabrys	0.09351	0.1383	89.23	0.000202	0.00207
D_0__Bacteria;D_1__Chloroflexi;D_2__SBR2076;D_3__uncultured Anaerolineaceae bacterium;D_4__uncultured Anaerolineaceae bacterium;D_5__uncultured Anaerolineaceae bacterium	0.09311	0.1378	89.37	0.000195	0.00203
D_0__Bacteria;D_1__Acidobacteria;D_2__Acidobacteria;D_3__Acidobacteriales;D_4__Acidobacteriaceae (Subgroup 1);Other	0.09252	0.1369	89.51	0.00246	0.00143
D_0__Bacteria;D_1__Actinobacteria;D_2__Actinobacteria;D_3__Streptomycetales;D_4__Streptomycetaceae;D_5__Streptomyces	0.09088	0.1345	89.64	0.00019	0.00201
D_0__Bacteria;D_1__Firmicutes;D_2__Clostridia;D_3__Clostridiales;D_4__Clostridiaceae 1;D_5__Clostridium sensu stricto 8	0.08906	0.1318	89.77	0.00196	0.000177
D_0__Bacteria;D_1__Proteobacteria;D_2__Gammaproteobacteria;D_3__Xanthomonadales;D_4__Xanthomonadaceae;D_5__Rhodanobacter	0.0869	0.1286	89.9	0.000146	0.00188
D_0__Bacteria;D_1__Bacteroidetes;D_2__Bacteroidetes vadinHA17;D_3__uncultured bacterium;D_4__uncultured bacterium;D_5__uncultured bacterium	0.08635	0.1278	90.03	0.00116	0.00204
D_0__Bacteria;D_1__Proteobacteria;D_2__Gammaproteobacteria;D_3__Xanthomonadales;D_4__Xanthomonadaceae;D_5__Lysobacter	0.08186	0.1211	90.15	0.000136	0.00177
D_0__Bacteria;D_1__Proteobacteria;D_2__Alphaproteobacteria;D_3__Rhodospirillales;D_4__JG37-AG-20;Other	0.08087	0.1196	90.27	0.000117	0.00173
D_0__Bacteria;D_1__Nitrospirae;D_2__Nitrospira;D_3__Nitrospirales;D_4__Nitrospiraceae;D_5__Nitrospira	0.08035	0.1189	90.39	0.000138	0.00175
D_0__Bacteria;D_1__Proteobacteria;D_2__Deltaproteobacteria;D_3__Myxococcales;D_4__Haliangiaceae;D_5__Haliangium	0.07958	0.1177	90.51	0.000217	0.00181
D_0__Bacteria;D_1__Firmicutes;D_2__Clostridia;D_3__Clostridiales;D_4__Ruminococcaceae;D_5__Caproiciproducens	0.0794	0.1175	90.63	0.00169	0.000101
D_0__Bacteria;D_1__Firmicutes;D_2__Clostridia;D_3__Clostridiales;D_4__Peptococcaceae;Other	0.07847	0.1161	90.74	0.00257	0.00173
D_0__Bacteria;D_1__Firmicutes;D_2__Bacilli;D_3__Bacillales;D_4__Alicyclobacillaceae;D_5__Alicyclobacillus	0.07755	0.1147	90.86	0.000886	0.00225
D_0__Bacteria;D_1__Proteobacteria;D_2__Gammaproteobacteria;D_3__Xanthomonadales;D_4__Xanthomonadales Incertae Sedis;D_5__Acidibacter	0.07702	0.1139	90.97	0.00144	0.00154
D_0__Bacteria;D_1__Firmicutes;D_2__Clostridia;D_3__Clostridiales;D_4__Peptostreptococcaceae;Other	0.07702	0.1139	91.08	0.00162	0.0000762
D_0__Bacteria;D_1__Chloroflexi;D_2__Ktedonobacteria;D_3__Ktedonobacterales;D_4__1921-3;Other	0.07642	0.1131	91.2	0.0000898	0.00161
D_0__Bacteria;D_1__Proteobacteria;D_2__Deltaproteobacteria;D_3__Syntrophobacterales;D_4__Syntrophaceae;D_5__Desulfomonile	0.07516	0.1112	91.31	0.0018	0.000298
D_0__Bacteria;D_1__Actinobacteria;D_2__Acidimicrobiia;D_3__Acidimicrobiales;Other;Other	0.07455	0.1103	91.42	0.000177	0.00167
D_0__Bacteria;D_1__Firmicutes;D_2__Bacilli;D_3__Bacillales;D_4__Thermoactinomycetaceae;D_5__Thermoflavimicrobium	0.07422	0.1098	91.53	0.0016	0.000112
D_0__Bacteria;D_1__Acidobacteria;D_2__Acidobacteria;D_3__Acidobacteriales;D_4__Acidobacteriaceae (Subgroup 1);D_5__Acidobacterium	0.07188	0.1063	91.63	0.00182	0.000441
D_0__Bacteria;D_1__Proteobacteria;D_2__Deltaproteobacteria;D_3__Sva0485;Other;Other	0.07172	0.1061	91.74	0.000249	0.00159
D_0__Bacteria;D_1__Planctomycetes;D_2__Planctomycetacia;D_3__Planctomycetales;D_4__Planctomycetaceae;Other	0.07136	0.1056	91.85	0.0015	0.000075
D_0__Bacteria;D_1__Bacteroidetes;D_2__Bacteroidetes vadinHA17;Ambiguous_taxa;Ambiguous_taxa;Ambiguous_taxa	0.07021	0.1039	91.95	0.00221	0.00228
D_0__Bacteria;D_1__Verrucomicrobia;D_2__Spartobacteria;D_3__Chthoniobacterales;D_4__Xiphinematobacteraceae;D_5__Candidatus Xiphinematobacter	0.06943	0.1027	92.05	0.000123	0.00151
D_0__Bacteria;D_1__Firmicutes;D_2__Clostridia;D_3__Clostridiales;D_4__Peptococcaceae;D_5__Pelotomaculum	0.06929	0.1025	92.16	0.00146	0.0000745
D_0__Bacteria;D_1__Proteobacteria;D_2__Deltaproteobacteria;D_3__Myxococcales;D_4__Polyangiaceae;D_5__Sorangium	0.06914	0.1023	92.26	0.000141	0.00152
D_0__Bacteria;D_1__Firmicutes;D_2__Erysipelotrichia;D_3__Erysipelotrichales;D_4__Erysipelotrichaceae;D_5__Turicibacter	0.06808	0.1007	92.36	0.00145	0.000091
D_0__Bacteria;D_1__Proteobacteria;D_2__Betaproteobacteria;D_3__Burkholderiales;D_4__Burkholderiaceae;D_5__Burkholderia-Paraburkholderia	0.06806	0.1007	92.46	0.000629	0.00179
D_0__Bacteria;D_1__Actinobacteria;D_2__Actinobacteria;D_3__Catenulisporales;D_4__Catenulisporaceae;D_5__Catenulispora	0.06737	0.09967	92.56	0.000159	0.00151
D_0__Bacteria;D_1__Proteobacteria;D_2__Betaproteobacteria;D_3__SC-I-84;D_4__uncultured Rhodocyclaceae bacterium;D_5__uncultured Rhodocyclaceae bacterium	0.06518	0.09643	92.66	0.000101	0.0014
D_0__Bacteria;D_1__Chloroflexi;D_2__Ktedonobacteria;D_3__C0119;D_4__uncultured bacterium;D_5__uncultured bacterium	0.06471	0.09574	92.75	0.000093	0.00139
D_0__Bacteria;D_1__Proteobacteria;D_2__Gammaproteobacteria;D_3__Xanthomonadales;D_4__Xanthomonadaceae;D_5__Dokdonella	0.06381	0.0944	92.85	0.000139	0.0014
D_0__Bacteria;D_1__Chloroflexi;D_2__Ktedonobacteria;D_3__JG30-KF-AS9;Other;Other	0.0627	0.09276	92.94	0.000101	0.00135
D_0__Bacteria;D_1__Proteobacteria;D_2__Gammaproteobacteria;D_3__Pseudomonadales;D_4__Pseudomonadaceae;D_5__Pseudomonas	0.06171	0.09129	93.03	0.00013	0.00136
D_0__Bacteria;D_1__Acidobacteria;D_2__Acidobacteria;D_3__Acidobacteriales;D_4__Acidobacteriaceae (Subgroup 1);D_5__Granulicella	0.05996	0.08871	93.12	0.00127	0.000967
D_0__Archaea;D_1__Thaumarchaeota;D_2__FHMa11 terrestrial group;D_3__uncultured archaeon;D_4__uncultured archaeon;D_5__uncultured archaeon	0.05902	0.08732	93.21	0.0000415	0.00121
D_0__Archaea;D_1__Bathyarchaeota;Other;Other;Other;Other	0.0584	0.0864	93.29	0.0017	0.00107
D_0__Bacteria;D_1__Firmicutes;D_2__Clostridia;D_3__Clostridiales;D_4__Peptococcaceae;D_5__Desulfitobacterium	0.0578	0.08552	93.38	0.00134	0.000186
D_0__Bacteria;D_1__Verrucomicrobia;D_2__Spartobacteria;D_3__Chthoniobacterales;D_4__DA101 soil group;Other	0.0575	0.08507	93.46	0.0000983	0.00125
D_0__Bacteria;D_1__Chloroflexi;D_2__KD4-96;Other;Other;Other	0.05388	0.07971	93.54	0.000123	0.0012
D_0__Bacteria;D_1__Proteobacteria;D_2__Betaproteobacteria;D_3__Burkholderiales;D_4__Burkholderiaceae;D_5__Ralstonia	0.05382	0.07962	93.62	0.00163	0.000683
D_0__Bacteria;D_1__Actinobacteria;D_2__Actinobacteria;D_3__Corynebacteriales;D_4__Mycobacteriaceae;D_5__Mycobacterium	0.05226	0.07731	93.7	0.00156	0.00124
D_0__Bacteria;D_1__Proteobacteria;D_2__Alphaproteobacteria;D_3__Rhodospirillales;D_4__Acetobacteraceae;Other	0.05101	0.07546	93.77	0.00108	0.0000568
D_0__Bacteria;D_1__Proteobacteria;D_2__Deltaproteobacteria;D_3__SAR324 clade(Marine group B);Ambiguous_taxa;Ambiguous_taxa	0.04953	0.07328	93.85	0.0000864	0.00108
D_0__Bacteria;D_1__Proteobacteria;D_2__Deltaproteobacteria;D_3__Syntrophobacterales;D_4__Syntrophobacteraceae;D_5__uncultured	0.0493	0.07293	93.92	0.00115	0.000739
D_0__Bacteria;D_1__Firmicutes;D_2__Clostridia;D_3__Clostridiales;D_4__Peptococcaceae;D_5__Desulfotomaculum	0.04864	0.07196	93.99	0.00103	0.0000597
D_0__Bacteria;D_1__Firmicutes;D_2__Clostridia;D_3__Clostridiales;D_4__Gracilibacteraceae;D_5__uncultured	0.04833	0.07149	94.06	0.00103	0.000061
D_0__Bacteria;D_1__Proteobacteria;D_2__Alphaproteobacteria;D_3__Rhodospirillales;Other;Other	0.04715	0.06975	94.13	0.00006	0.00096
D_0__Bacteria;D_1__Acidobacteria;D_2__Solibacteres;D_3__Solibacterales;D_4__Solibacteraceae (Subgroup 3);D_5__Paludibaculum	0.04699	0.06952	94.2	0.00118	0.000409
D_0__Bacteria;D_1__Chloroflexi;D_2__S085;Ambiguous_taxa;Ambiguous_taxa;Ambiguous_taxa	0.04673	0.06914	94.27	0.0000699	0.001
D_0__Bacteria;D_1__Actinobacteria;D_2__Thermoleophilia;D_3__Solirubrobacterales;Ambiguous_taxa;Ambiguous_taxa	0.04611	0.06822	94.34	0.000627	0.00117
D_0__Bacteria;D_1__Firmicutes;D_2__Bacilli;D_3__Bacillales;D_4__Paenibacillaceae;D_5__Paenibacillus	0.04509	0.06671	94.41	0.00133	0.000454
D_0__Bacteria;D_1__Firmicutes;D_2__Clostridia;D_3__Halanaerobiales;D_4__ODP1230B8.23;Other	0.04504	0.06664	94.47	0.000983	0.0000824
D_0__Bacteria;D_1__Proteobacteria;D_2__Deltaproteobacteria;D_3__Myxococcales;D_4__BIrii41;D_5__uncultured bacterium	0.04436	0.06562	94.54	0.0000722	0.000959
D_0__Bacteria;D_1__Firmicutes;D_2__Clostridia;D_3__Clostridiales;D_4__Ruminococcaceae;D_5__uncultured	0.04424	0.06546	94.61	0.00101	0.000122
D_0__Bacteria;D_1__Proteobacteria;D_2__Alphaproteobacteria;D_3__Rhodospirillales;D_4__Rhodospirillales Incertae Sedis;D_5__Reyranella	0.04348	0.06432	94.67	0.0000887	0.000958
D_0__Bacteria;D_1__Chloroflexi;D_2__Ktedonobacteria;D_3__Ktedonobacterales;D_4__JG30a-KF-32;Other	0.04312	0.06379	94.73	0.0000723	0.000935
D_0__Bacteria;D_1__Spirochaetae;D_2__Spirochaetes;D_3__Spirochaetales;D_4__Spirochaetaceae;D_5__uncultured	0.04238	0.06269	94.8	0.000892	0.0000463
D_0__Bacteria;D_1__Firmicutes;D_2__Bacilli;D_3__Bacillales;D_4__Bacillaceae;D_5__Ureibacillus	0.04213	0.06233	94.86	0.000898	0.0000554
D_0__Bacteria;D_1__Proteobacteria;D_2__Betaproteobacteria;D_3__Nitrosomonadales;D_4__Gallionellaceae;D_5__uncultured	0.04181	0.06186	94.92	0.0000731	0.000908
D_0__Bacteria;D_1__Actinobacteria;D_2__Thermoleophilia;D_3__Solirubrobacterales;D_4__Elev-16S-1332;D_5__uncultured bacterium	0.04174	0.06175	94.98	0.00011	0.000944
D_0__Bacteria;D_1__Planctomycetes;D_2__Planctomycetacia;D_3__Planctomycetales;D_4__Planctomycetaceae;Ambiguous_taxa	0.04032	0.05965	95.04	0.000142	0.000949
D_0__Bacteria;D_1__Proteobacteria;D_2__Alphaproteobacteria;D_3__Rhizobiales;D_4__Methylocystaceae;Other	0.04026	0.05957	95.1	0.00101	0.000303
D_0__Bacteria;D_1__Actinobacteria;D_2__Thermoleophilia;D_3__Gaiellales;D_4__uncultured;Other	0.04006	0.05927	95.16	0.000541	0.000909
D_0__Archaea;D_1__Euryarchaeota;D_2__Methanomicrobia;D_3__Methanosarcinales;D_4__GOM Arc I;D_5__uncultured archaeon	0.04001	0.05918	95.22	0.0000194	0.000811
D_0__Bacteria;D_1__Proteobacteria;D_2__Alphaproteobacteria;D_3__Rhodospirillales;D_4__JG37-AG-20;D_5__uncultured bacterium	0.03953	0.05848	95.28	0.0000705	0.000861
D_0__Bacteria;D_1__Acidobacteria;D_2__Blastocatellia;D_3__Blastocatellales;D_4__Blastocatellaceae (Subgroup 4);D_5__uncultured	0.03815	0.05643	95.33	0.0000521	0.000815
D_0__Bacteria;D_1__Proteobacteria;D_2__Gammaproteobacteria;D_3__Xanthomonadales;D_4__uncultured;Other	0.0381	0.05636	95.39	0.0000771	0.000839
D_0__Bacteria;D_1__Bacteroidetes;D_2__Sphingobacteriia;D_3__Sphingobacteriales;D_4__CWT CU03-E12;Other	0.03804	0.05627	95.45	0.000848	0.000208
D_0__Bacteria;D_1__Bacteroidetes;D_2__Sphingobacteriia;D_3__Sphingobacteriales;D_4__Sphingobacteriaceae;D_5__Mucilaginibacter	0.03786	0.05601	95.5	0.0000614	0.000813
D_0__Bacteria;D_1__Verrucomicrobia;D_2__Spartobacteria;D_3__Chthoniobacterales;D_4__DA101 soil group;Ambiguous_taxa	0.03742	0.05536	95.56	0.0000678	0.000816
D_0__Bacteria;D_1__Nitrospirae;D_2__Nitrospira;D_3__Nitrospirales;D_4__FW13;Ambiguous_taxa	0.03726	0.05512	95.61	0.0000566	0.000801
D_0__Bacteria;D_1__Actinobacteria;D_2__Acidimicrobiia;D_3__Acidimicrobiales;D_4__uncultured;D_5__uncultured actinobacterium	0.03723	0.05509	95.67	0.000791	0.000046
D_0__Bacteria;D_1__Actinobacteria;D_2__Thermoleophilia;D_3__Solirubrobacterales;D_4__Elev-16S-1332;Other	0.03696	0.05468	95.72	0.0000672	0.000806
D_0__Archaea;D_1__Thaumarchaeota;D_2__FHMa11 terrestrial group;D_3__uncultured thaumarchaeote;D_4__uncultured thaumarchaeote;D_5__uncultured thaumarchaeote	0.03688	0.05456	95.78	0.0000305	0.000761
D_0__Bacteria;D_1__Firmicutes;D_2__Clostridia;D_3__Clostridiales;D_4__Gracilibacteraceae;D_5__Lutispora	0.03671	0.05431	95.83	0.000819	0.0000852
D_0__Bacteria;D_1__Proteobacteria;D_2__Betaproteobacteria;D_3__Burkholderiales;D_4__Burkholderiales Incertae Sedis;D_5__Thiomonas	0.03663	0.05419	95.89	0.000774	0.0000416
D_0__Bacteria;D_1__Verrucomicrobia;D_2__OPB35 soil group;Ambiguous_taxa;Ambiguous_taxa;Ambiguous_taxa	0.0366	0.05415	95.94	0.0000637	0.000796
D_0__Bacteria;D_1__Proteobacteria;D_2__Alphaproteobacteria;D_3__Rhizobiales;D_4__Bradyrhizobiaceae;D_5__Afipia	0.03622	0.05359	95.99	0.0000955	0.000818
D_0__Bacteria;D_1__Acidobacteria;D_2__Solibacteres;D_3__Solibacterales;D_4__Solibacteraceae (Subgroup 3);D_5__GOUTB8	0.03622	0.05359	96.05	0.000853	0.000388
D_0__Bacteria;D_1__Proteobacteria;D_2__Alphaproteobacteria;D_3__Sphingomonadales;D_4__Sphingomonadaceae;D_5__Sphingomonas	0.0357	0.05282	96.1	0.000697	0.000103
D_0__Bacteria;D_1__Firmicutes;D_2__Clostridia;D_3__Clostridiales;D_4__Clostridiales vadinBB60 group;D_5__uncultured bacterium	0.03543	0.05242	96.15	0.000764	0.0000557
D_0__Bacteria;D_1__Bacteroidetes;D_2__Bacteroidia;D_3__Bacteroidales;D_4__Porphyromonadaceae;D_5__Microbacter	0.03535	0.0523	96.21	0.000736	0.0000286
D_0__Bacteria;D_1__Ignavibacteriae;D_2__Ignavibacteria;D_3__Ignavibacteriales;Other;Other	0.03492	0.05166	96.26	0.000824	0.000128
D_0__Bacteria;D_1__Firmicutes;D_2__Bacilli;D_3__Bacillales;D_4__Alicyclobacillaceae;D_5__Tumebacillus	0.0349	0.05163	96.31	0.000834	0.000141
D_0__Bacteria;D_1__Proteobacteria;D_2__Betaproteobacteria;D_3__Burkholderiales;D_4__Oxalobacteraceae;D_5__Undibacterium	0.03318	0.04909	96.36	0.000719	0.000248
D_0__Bacteria;D_1__Proteobacteria;D_2__Betaproteobacteria;D_3__TRA3-20;D_4__uncultured bacterium;D_5__uncultured bacterium	0.033	0.04883	96.41	0.0000749	0.000735
D_0__Archaea;D_1__Thaumarchaeota;D_2__South African Gold Mine Gp 1(SAGMCG-1);D_3__Unknown Order;D_4__Unknown Family;D_5__Candidatus Nitrosotalea	0.03294	0.04873	96.46	0.0000484	0.000704
D_0__Bacteria;D_1__Firmicutes;D_2__Clostridia;D_3__Clostridiales;D_4__Peptostreptococcaceae;D_5__Intestinibacter	0.03198	0.04732	96.5	0.000673	0.0000332
D_0__Bacteria;D_1__Armatimonadetes;D_2__Chthonomonadetes;D_3__Chthonomonadales;D_4__uncultured bacterium;D_5__uncultured bacterium	0.03171	0.04692	96.55	0.000739	0.000114
D_0__Bacteria;D_1__Firmicutes;D_2__Clostridia;D_3__Clostridiales;D_4__Clostridiaceae 1;D_5__Clostridium sensu stricto 11	0.03116	0.0461	96.6	0.000713	0.0000913
D_0__Bacteria;D_1__Firmicutes;D_2__Clostridia;D_3__Clostridiales;D_4__Christensenellaceae;D_5__Christensenellaceae R-7 group	0.03115	0.04609	96.64	0.000656	0.0000335
D_0__Bacteria;D_1__Proteobacteria;D_2__Alphaproteobacteria;D_3__Rhizobiales;D_4__Methylobacteriaceae;D_5__uncultured	0.03038	0.04494	96.69	0.0000469	0.000648
D_0__Bacteria;D_1__Chloroflexi;D_2__SJA-15;D_3__uncultured bacterium;D_4__uncultured bacterium;D_5__uncultured bacterium	0.0301	0.04453	96.73	0.000676	0.000194
D_0__Bacteria;D_1__Acidobacteria;D_2__Acidobacteria;D_3__Acidobacteriales;D_4__Acidobacteriaceae (Subgroup 1);D_5__Acidicapsa	0.02993	0.04428	96.78	0.000629	0.0000378
D_0__Bacteria;D_1__Chloroflexi;D_2__Dehalococcoidia;D_3__GIF3;D_4__uncultured bacterium;D_5__uncultured bacterium	0.02986	0.04417	96.82	0.000834	0.000282
D_0__Bacteria;D_1__Acidobacteria;D_2__Subgroup 17;D_3__uncultured bacterium;D_4__uncultured bacterium;D_5__uncultured bacterium	0.02981	0.0441	96.86	0.0000496	0.000645
D_0__Bacteria;D_1__Chloroflexi;D_2__TK10;Other;Other;Other	0.02968	0.04391	96.91	0.000944	0.00102
D_0__Bacteria;D_1__Firmicutes;D_2__Clostridia;D_3__Clostridiales;D_4__Peptococcaceae;D_5__Thermincola	0.02953	0.04369	96.95	0.000617	0.0000285
D_0__Bacteria;D_1__Acidobacteria;D_2__Subgroup 6;D_3__uncultured Acidobacteria bacterium;D_4__uncultured Acidobacteria bacterium;D_5__uncultured Acidobacteria bacterium	0.02932	0.04338	96.99	0.0000473	0.000634
D_0__Bacteria;D_1__Saccharibacteria;D_2__uncultured bacterium;D_3__uncultured bacterium;D_4__uncultured bacterium;D_5__uncultured bacterium	0.02924	0.04326	97.04	0.000611	0.0000263
D_0__Bacteria;D_1__Proteobacteria;D_2__Betaproteobacteria;D_3__Burkholderiales;D_4__Comamonadaceae;Ambiguous_taxa	0.02919	0.04319	97.08	0.0000759	0.000652
D_0__Bacteria;D_1__Bacteroidetes;D_2__Bacteroidetes vadinHA17;Other;Other;Other	0.02918	0.04317	97.12	0.0012	0.000667
D_0__Bacteria;D_1__Actinobacteria;D_2__Actinobacteria;D_3__Frankiales;D_4__Frankiaceae;D_5__Jatrophihabitans	0.02917	0.04315	97.17	0.00008	0.000661
D_0__Bacteria;D_1__Proteobacteria;D_2__Deltaproteobacteria;D_3__Myxococcales;D_4__Sandaracinaceae;D_5__uncultured	0.02912	0.04309	97.21	0.0000409	0.000623
D_0__Bacteria;D_1__Planctomycetes;D_2__Phycisphaerae;D_3__Tepidisphaerales;D_4__Tepidisphaeraceae;D_5__uncultured bacterium	0.02875	0.04253	97.25	0.0000505	0.000623
D_0__Bacteria;D_1__Proteobacteria;D_2__Deltaproteobacteria;D_3__SAR324 clade(Marine group B);Other;Other	0.02874	0.04252	97.3	0.0000431	0.000618
D_0__Bacteria;D_1__Planctomycetes;D_2__Planctomycetacia;D_3__Planctomycetales;D_4__Planctomycetaceae;D_5__Singulisphaera	0.02855	0.04223	97.34	0.0000655	0.000636
D_0__Bacteria;D_1__Gemmatimonadetes;D_2__S0134 terrestrial group;D_3__uncultured bacterium;D_4__uncultured bacterium;D_5__uncultured bacterium	0.0284	0.04201	97.38	0.000751	0.000405
D_0__Bacteria;D_1__Proteobacteria;D_2__Gammaproteobacteria;D_3__Pseudomonadales;D_4__Moraxellaceae;D_5__Acinetobacter	0.02823	0.04176	97.42	0.000599	0.000698
D_0__Bacteria;D_1__Proteobacteria;D_2__Betaproteobacteria;D_3__Nitrosomonadales;D_4__Gallionellaceae;Other	0.02798	0.0414	97.46	0.0000474	0.000576
D_0__Bacteria;D_1__Proteobacteria;D_2__Betaproteobacteria;D_3__Burkholderiales;D_4__Oxalobacteraceae;Other	0.02797	0.04138	97.5	0.0000467	0.000604
D_0__Bacteria;D_1__Firmicutes;D_2__Clostridia;D_3__D8A-2;Other;Other	0.02754	0.04074	97.55	0.000576	0.0000274
D_0__Bacteria;D_1__Chlorobi;D_2__Chlorobia;D_3__Chlorobiales;D_4__SJA-28;D_5__uncultured bacterium	0.02654	0.03927	97.58	0.0000592	0.00058
D_0__Bacteria;D_1__Bacteroidetes;D_2__Cytophagia;D_3__Cytophagales;D_4__Cytophagaceae;D_5__uncultured	0.02615	0.03869	97.62	0.0000443	0.000567
D_0__Bacteria;D_1__Proteobacteria;D_2__Deltaproteobacteria;D_3__Myxococcales;D_4__Myxococcaceae;Other	0.0261	0.03861	97.66	0.0000548	0.000576
D_0__Archaea;D_1__Thaumarchaeota;D_2__Soil Crenarchaeotic Group(SCG);D_3__uncultured archaeon;D_4__uncultured archaeon;D_5__uncultured archaeon	0.02559	0.03786	97.7	0.0000323	0.000544
D_0__Bacteria;D_1__Planctomycetes;D_2__Phycisphaerae;D_3__CPla-3 termite group;D_4__uncultured planctomycete;D_5__uncultured planctomycete	0.02545	0.03765	97.74	0.000035	0.000544
D_0__Bacteria;D_1__Ignavibacteriae;D_2__Ignavibacteria;D_3__Ignavibacteriales;D_4__BSV26;Other	0.02504	0.03704	97.77	0.0000558	0.000554
D_0__Bacteria;D_1__Acidobacteria;D_2__Subgroup 6;Other;Other;Other	0.0248	0.03668	97.81	0.000293	0.000702
D_0__Bacteria;D_1__Proteobacteria;D_2__Betaproteobacteria;D_3__Nitrosomonadales;D_4__Gallionellaceae;D_5__Gallionella	0.02445	0.03618	97.85	0.0000363	0.000512
D_0__Bacteria;D_1__Acidobacteria;D_2__Subgroup 18;D_3__uncultured bacterium;D_4__uncultured bacterium;D_5__uncultured bacterium	0.02424	0.03587	97.88	0.0000359	0.000518
D_0__Bacteria;D_1__Firmicutes;D_2__Bacilli;D_3__Bacillales;D_4__Paenibacillaceae;D_5__Ammoniphilus	0.02399	0.03549	97.92	0.000725	0.000247
D_0__Bacteria;D_1__Firmicutes;D_2__Clostridia;D_3__Clostridiales;D_4__Caldicoprobacteraceae;D_5__Caldicoprobacter	0.02339	0.0346	97.95	0.000514	0.0000499
D_0__Bacteria;D_1__Firmicutes;D_2__Bacilli;D_3__Bacillales;D_4__Planococcaceae;D_5__Lysinibacillus	0.02267	0.03354	97.99	0.000696	0.000255
D_0__Bacteria;D_1__Actinobacteria;D_2__Actinobacteria;D_3__Micrococcales;D_4__Microbacteriaceae;Ambiguous_taxa	0.02262	0.03346	98.02	0.0000623	0.000501
D_0__Bacteria;D_1__Actinobacteria;D_2__Thermoleophilia;D_3__Gaiellales;D_4__Gaiellaceae;D_5__Gaiella	0.02223	0.03288	98.05	0.0000437	0.000483
D_0__Bacteria;D_1__Parcubacteria;D_2__Candidatus Moranbacteria;D_3__uncultured Parcubacteria group bacterium;D_4__uncultured Parcubacteria group bacterium;D_5__uncultured Parcubacteria group bacterium	0.02222	0.03288	98.09	0.000541	0.000181
D_0__Bacteria;D_1__Firmicutes;D_2__Bacilli;D_3__Bacillales;D_4__Planococcaceae;Ambiguous_taxa	0.0217	0.0321	98.12	0.000548	0.000114
D_0__Bacteria;D_1__Cyanobacteria;D_2__ML635J-21;D_3__uncultured bacterium;D_4__uncultured bacterium;D_5__uncultured bacterium	0.02154	0.03186	98.15	0.000551	0.000153
D_0__Bacteria;D_1__Chloroflexi;D_2__Dehalococcoidia;D_3__vadinBA26;D_4__uncultured bacterium;D_5__uncultured bacterium	0.02137	0.03162	98.18	0.000603	0.000324
D_0__Bacteria;D_1__Proteobacteria;D_2__Betaproteobacteria;D_3__Hydrogenophilales;D_4__Hydrogenophilaceae;D_5__uncultured	0.02128	0.03149	98.21	0.0000337	0.000458
D_0__Bacteria;D_1__Firmicutes;D_2__Clostridia;D_3__Clostridiales;D_4__Clostridiales Incertae Sedis;D_5__Proteiniborus	0.02112	0.03124	98.24	0.000448	0.0000257
D_0__Bacteria;D_1__Firmicutes;D_2__Clostridia;D_3__Clostridiales;D_4__Clostridiaceae 1;D_5__Clostridium sensu stricto 10	0.02078	0.03074	98.27	0.000542	0.000128
D_0__Bacteria;D_1__Chloroflexi;D_2__Ktedonobacteria;D_3__Ktedonobacterales;D_4__Ktedonobacteraceae;Other	0.02068	0.03059	98.31	0.0000685	0.000482
D_0__Bacteria;D_1__Firmicutes;D_2__Clostridia;D_3__Clostridiales;D_4__Ruminococcaceae;D_5__Anaerobacterium	0.02021	0.0299	98.34	0.000435	0.0000344
D_0__Archaea;D_1__Thaumarchaeota;D_2__Soil Crenarchaeotic Group(SCG);Other;Other;Other	0.02006	0.02967	98.37	0.000025	0.000424
D_0__Bacteria;D_1__Acidobacteria;D_2__Acidobacteria;D_3__Acidobacteriales;D_4__Acidobacteriaceae (Subgroup 1);Ambiguous_taxa	0.01984	0.02935	98.39	0.000403	0.000623
D_0__Bacteria;D_1__Firmicutes;D_2__Clostridia;D_3__Clostridiales;D_4__Peptococcaceae;D_5__uncultured	0.01981	0.02931	98.42	0.000442	0.0000524
D_0__Bacteria;D_1__Proteobacteria;D_2__Deltaproteobacteria;D_3__Syntrophobacterales;D_4__Syntrophaceae;D_5__Syntrophus	0.01964	0.02905	98.45	0.000571	0.000356
D_0__Bacteria;D_1__Firmicutes;D_2__Bacilli;D_3__Bacillales;D_4__Planococcaceae;D_5__uncultured	0.01918	0.02837	98.48	0.00052	0.000148
D_0__Bacteria;D_1__Actinobacteria;D_2__Acidimicrobiia;D_3__Acidimicrobiales;D_4__Acidimicrobiaceae;D_5__Acidithrix	0.01905	0.02818	98.51	0.000401	0.0000195
D_0__Bacteria;D_1__Proteobacteria;D_2__Alphaproteobacteria;D_3__Caulobacterales;D_4__Caulobacteraceae;D_5__uncultured	0.01896	0.02804	98.54	0.0000583	0.000435
D_0__Bacteria;D_1__Elusimicrobia;D_2__Elusimicrobia;D_3__Lineage IIa;Other;Other	0.01894	0.02802	98.57	0.0000338	0.000412
D_0__Bacteria;D_1__Proteobacteria;D_2__Betaproteobacteria;D_3__Nitrosomonadales;D_4__Nitrosomonadaceae;Other	0.01891	0.02797	98.59	0.000399	0.0000244
D_0__Bacteria;D_1__Proteobacteria;D_2__Alphaproteobacteria;D_3__Caulobacterales;D_4__Caulobacteraceae;D_5__Brevundimonas	0.01859	0.0275	98.62	0.000369	0.000027
D_0__Bacteria;D_1__Chloroflexi;D_2__uncultured Bellilinea sp.;D_3__uncultured Bellilinea sp.;D_4__uncultured Bellilinea sp.;D_5__uncultured Bellilinea sp.	0.01824	0.02699	98.65	0.000029	0.000391
D_0__Bacteria;D_1__Proteobacteria;D_2__Deltaproteobacteria;D_3__Syntrophobacterales;D_4__Syntrophobacteraceae;D_5__Syntrophobacter	0.01812	0.02681	98.67	0.000515	0.000168
D_0__Bacteria;D_1__Proteobacteria;D_2__Deltaproteobacteria;D_3__Deltaproteobacteria Incertae Sedis;D_4__Syntrophorhabdaceae;D_5__Syntrophorhabdus	0.01782	0.02636	98.7	0.0000277	0.000382
D_0__Bacteria;D_1__Chloroflexi;D_2__Ktedonobacteria;D_3__Ktedonobacterales;D_4__1959-1;D_5__uncultured bacterium	0.01778	0.02631	98.73	0.0000453	0.000399
D_0__Bacteria;D_1__Firmicutes;D_2__Bacilli;D_3__Bacillales;D_4__Bacillaceae;D_5__Anaerobacillus	0.01749	0.02587	98.75	0.000365	0.0000149
D_0__Archaea;D_1__Thaumarchaeota;D_2__AK59;Ambiguous_taxa;Ambiguous_taxa;Ambiguous_taxa	0.01738	0.02572	98.78	0.000202	0.00031
D_0__Bacteria;D_1__Actinobacteria;D_2__Actinobacteria;D_3__Frankiales;D_4__Geodermatophilaceae;D_5__Blastococcus	0.01727	0.02555	98.8	0.000348	0.0000154
D_0__Bacteria;D_1__Firmicutes;D_2__Bacilli;D_3__Bacillales;D_4__Thermoactinomycetaceae;D_5__Planifilum	0.01725	0.02552	98.83	0.00037	0.0000249
D_0__Bacteria;D_1__Acidobacteria;D_2__Subgroup 18;Ambiguous_taxa;Ambiguous_taxa;Ambiguous_taxa	0.01697	0.02511	98.86	0.000111	0.000428
D_0__Bacteria;D_1__Latescibacteria;Ambiguous_taxa;Ambiguous_taxa;Ambiguous_taxa;Ambiguous_taxa	0.01678	0.02482	98.88	0.0000194	0.000355
D_0__Bacteria;D_1__Acidobacteria;D_2__Blastocatellia;D_3__Blastocatellales;D_4__Blastocatellaceae (Subgroup 4);D_5__11-24	0.01673	0.02475	98.9	0.0000244	0.000353
D_0__Bacteria;D_1__Armatimonadetes;D_2__uncultured;D_3__uncultured bacterium;D_4__uncultured bacterium;D_5__uncultured bacterium	0.01653	0.02445	98.93	0.000352	0.0000259
D_0__Bacteria;D_1__Actinobacteria;D_2__Actinobacteria;D_3__Catenulisporales;D_4__Actinospicaceae;D_5__Actinospica	0.01583	0.02342	98.95	0.0000355	0.000349
D_0__Bacteria;D_1__Proteobacteria;D_2__Betaproteobacteria;D_3__Hydrogenophilales;D_4__Hydrogenophilaceae;D_5__Sulfuricella	0.01583	0.02341	98.98	0.0000341	0.000346
D_0__Archaea;D_1__Bathyarchaeota;Ambiguous_taxa;Ambiguous_taxa;Ambiguous_taxa;Ambiguous_taxa	0.01577	0.02333	99	0.000366	0.000409
D_0__Bacteria;D_1__Firmicutes;D_2__Bacilli;D_3__Bacillales;D_4__Planococcaceae;D_5__Sporosarcina	0.01517	0.02244	99.02	0.000505	0.000316
D_0__Bacteria;D_1__Actinobacteria;D_2__Coriobacteriia;D_3__Coriobacteriales;D_4__Coriobacteriaceae;D_5__uncultured	0.01514	0.02239	99.04	0.000324	0.0000225
D_0__Bacteria;D_1__Firmicutes;D_2__Bacilli;D_3__Bacillales;D_4__Planococcaceae;D_5__Psychrobacillus	0.01508	0.02231	99.07	0.00044	0.000148
D_0__Bacteria;D_1__Armatimonadetes;D_2__Armatimonadia;D_3__Armatimonadales;D_4__uncultured bacterium;D_5__uncultured bacterium	0.01496	0.02214	99.09	0.000319	0.0000201
D_0__Bacteria;D_1__Proteobacteria;D_2__Betaproteobacteria;D_3__SC-I-84;D_4__uncultured beta proteobacterium;D_5__uncultured beta proteobacterium	0.01438	0.02128	99.11	0.0000213	0.000309
D_0__Bacteria;D_1__Cyanobacteria;D_2__Melainabacteria;D_3__Gastranaerophilales;D_4__uncultured bacterium;D_5__uncultured bacterium	0.01435	0.02123	99.13	0.000303	0.0000163
D_0__Bacteria;D_1__Firmicutes;D_2__Clostridia;D_3__Clostridiales;D_4__Ruminococcaceae;D_5__Ruminiclostridium	0.01424	0.02107	99.15	0.0003	0.0000166
D_0__Bacteria;D_1__Firmicutes;D_2__Clostridia;D_3__Clostridiales;D_4__Lachnospiraceae;D_5__Marvinbryantia	0.01414	0.02093	99.17	0.000299	0.0000159
D_0__Bacteria;D_1__Verrucomicrobia;D_2__S-BQ2-57 soil group;D_3__uncultured bacterium;D_4__uncultured bacterium;D_5__uncultured bacterium	0.01413	0.02091	99.19	0.000017	0.000299
D_0__Bacteria;D_1__Proteobacteria;D_2__Alphaproteobacteria;D_3__Rhizobiales;D_4__Beijerinckiaceae;Other	0.01396	0.02065	99.21	0.000327	0.000282
D_0__Bacteria;D_1__Proteobacteria;D_2__Betaproteobacteria;D_3__Burkholderiales;D_4__Comamonadaceae;Other	0.01374	0.02033	99.23	0.000341	0.000108
D_0__Bacteria;D_1__Actinobacteria;D_2__Actinobacteria;D_3__Micrococcales;D_4__Microbacteriaceae;D_5__Leifsonia	0.01331	0.0197	99.25	0.0000368	0.000301
D_0__Bacteria;D_1__Acidobacteria;D_2__Subgroup 11;D_3__uncultured Acidobacteria bacterium;D_4__uncultured Acidobacteria bacterium;D_5__uncultured Acidobacteria bacterium	0.01326	0.01962	99.27	0.0000256	0.000289
D_0__Bacteria;D_1__Elusimicrobia;D_2__Elusimicrobia;D_3__Lineage IV;Other;Other	0.01325	0.0196	99.29	0.000295	0.0000314
D_0__Bacteria;D_1__Proteobacteria;D_2__Alphaproteobacteria;D_3__Rhodospirillales;D_4__DA111;D_5__uncultured alpha proteobacterium	0.01316	0.01947	99.31	0.000018	0.000281
D_0__Bacteria;D_1__Chloroflexi;D_2__Dehalococcoidia;D_3__GIF9;D_4__uncultured bacterium;D_5__uncultured bacterium	0.01314	0.01944	99.33	0.000511	0.000303
D_0__Bacteria;D_1__Planctomycetes;D_2__Planctomycetacia;D_3__Planctomycetales;D_4__Planctomycetaceae;D_5__Gemmata	0.01308	0.01936	99.35	0.0000242	0.000286
D_0__Bacteria;D_1__Proteobacteria;D_2__Alphaproteobacteria;D_3__Caulobacterales;D_4__Caulobacteraceae;Other	0.01255	0.01856	99.37	0.0000213	0.000272
D_0__Bacteria;D_1__Chloroflexi;D_2__Elev-1554;D_3__uncultured bacterium;D_4__uncultured bacterium;D_5__uncultured bacterium	0.01244	0.01841	99.39	0.000266	0.0000171
D_0__Bacteria;D_1__Parcubacteria;D_2__Candidatus Jorgensenbacteria bacterium GW2011_GWF2_41_8;D_3__Candidatus Jorgensenbacteria bacterium GW2011_GWF2_41_8;D_4__Candidatus Jorgensenbacteria bacterium GW2011_GWF2_41_8;D_5__Candidatus Jorgensenbacteria bacterium GW2011_GWF2_41_8	0.01234	0.01826	99.41	0.000257	0.00000984
D_0__Bacteria;D_1__RBG-1 (Zixibacteria);D_2__uncultured bacterium;D_3__uncultured bacterium;D_4__uncultured bacterium;D_5__uncultured bacterium	0.01228	0.01817	99.43	0.0000801	0.000305
D_0__Bacteria;D_1__Planctomycetes;D_2__Phycisphaerae;D_3__MSBL9;D_4__uncultured bacterium;D_5__uncultured bacterium	0.01225	0.01813	99.44	0.000315	0.000134
D_0__Bacteria;D_1__Parcubacteria;D_2__Candidatus Magasanikbacteria;D_3__uncultured bacterium;D_4__uncultured bacterium;D_5__uncultured bacterium	0.01223	0.01809	99.46	0.00029	0.0000535
D_0__Bacteria;D_1__Firmicutes;D_2__Clostridia;D_3__Clostridiales;D_4__Family XI;D_5__uncultured	0.0121	0.0179	99.48	0.000295	0.0000591
D_0__Bacteria;D_1__Acidobacteria;D_2__Acidobacteria;D_3__Acidobacteriales;D_4__Acidobacteriaceae (Subgroup 1);D_5__Edaphobacter	0.01202	0.01779	99.5	0.0000306	0.000269
D_0__Bacteria;D_1__Firmicutes;D_2__Clostridia;D_3__Clostridiales;D_4__Peptostreptococcaceae;D_5__Paraclostridium	0.01198	0.01772	99.52	0.000278	0.0000387
D_0__Bacteria;D_1__Firmicutes;D_2__Bacilli;D_3__Bacillales;D_4__Paenibacillaceae;D_5__Cohnella	0.01155	0.01709	99.53	0.000294	0.000063
D_0__Bacteria;D_1__Proteobacteria;D_2__Alphaproteobacteria;D_3__Rhizobiales;Other;Other	0.01125	0.01664	99.55	0.000115	0.000312
D_0__Bacteria;D_1__Proteobacteria;D_2__Betaproteobacteria;D_3__Rhodocyclales;D_4__Rhodocyclaceae;D_5__Sterolibacterium	0.01106	0.01637	99.57	0.000242	0.000164
D_0__Bacteria;D_1__Proteobacteria;D_2__Alphaproteobacteria;D_3__Rhizobiales;D_4__Hyphomicrobiaceae;D_5__uncultured	0.01097	0.01624	99.58	0.0000273	0.000247
D_0__Bacteria;D_1__Proteobacteria;D_2__Betaproteobacteria;D_3__Nitrosomonadales;D_4__Gallionellaceae;D_5__Candidatus Nitrotoga	0.0106	0.01568	99.6	0.0000225	0.000235
D_0__Bacteria;D_1__Firmicutes;D_2__Bacilli;D_3__Bacillales;D_4__Thermoactinomycetaceae;D_5__Thermoactinomyces	0.01057	0.01563	99.61	0.000249	0.0000377
D_0__Bacteria;D_1__Firmicutes;D_2__Clostridia;D_3__Clostridiales;D_4__Christensenellaceae;D_5__uncultured	0.01052	0.01557	99.63	0.000231	0.0000211
D_0__Bacteria;D_1__Chloroflexi;D_2__SBR2076;Ambiguous_taxa;Ambiguous_taxa;Ambiguous_taxa	0.01041	0.0154	99.64	0.000214	0.0000103
D_0__Bacteria;D_1__Planctomycetes;D_2__Pla4 lineage;D_3__uncultured bacterium;D_4__uncultured bacterium;D_5__uncultured bacterium	0.01016	0.01503	99.66	0.0000334	0.000228
D_0__Bacteria;D_1__Chloroflexi;D_2__Ktedonobacteria;D_3__Ktedonobacterales;D_4__Thermosporotrichaceae;D_5__uncultured	0.009896	0.01464	99.67	0.0000382	0.000232
D_0__Bacteria;D_1__Proteobacteria;D_2__Betaproteobacteria;D_3__Burkholderiales;D_4__Comamonadaceae;D_5__Variovorax	0.009618	0.01423	99.69	0.0000404	0.000227
D_0__Bacteria;D_1__Actinobacteria;D_2__Actinobacteria;D_3__Frankiales;D_4__Nakamurellaceae;D_5__Nakamurella	0.009085	0.01344	99.7	0.0000284	0.000205
D_0__Bacteria;D_1__Proteobacteria;D_2__Deltaproteobacteria;Other;Other;Other	0.008972	0.01327	99.71	0.0002	0.0000235
D_0__Bacteria;D_1__Actinobacteria;D_2__Actinobacteria;D_3__Corynebacteriales;D_4__Nocardiaceae;D_5__Nocardia	0.008471	0.01253	99.73	0.0000255	0.000192
D_0__Bacteria;D_1__Verrucomicrobia;D_2__OPB35 soil group;D_3__Unknown Order;D_4__Unknown Family;D_5__Pedosphaera	0.008151	0.01206	99.74	0.000023	0.000186
D_0__Bacteria;D_1__Firmicutes;D_2__Clostridia;D_3__D8A-2;D_4__uncultured bacterium;D_5__uncultured bacterium	0.007519	0.01112	99.75	0.000149	0.000237
D_0__Bacteria;D_1__Planctomycetes;D_2__Phycisphaerae;D_3__S15A-MN16;Other;Other	0.007436	0.011	99.76	0.000287	0.00018
D_0__Bacteria;D_1__Proteobacteria;D_2__Deltaproteobacteria;D_3__43F-1404R;Ambiguous_taxa;Ambiguous_taxa	0.007123	0.01054	99.77	0.0000652	0.000164
D_0__Bacteria;D_1__Proteobacteria;D_2__Alphaproteobacteria;D_3__Rhizobiales;D_4__Beijerinckiaceae;Ambiguous_taxa	0.00708	0.01047	99.78	0.000119	0.000151
D_0__Archaea;D_1__Thaumarchaeota;D_2__Group C3;Ambiguous_taxa;Ambiguous_taxa;Ambiguous_taxa	0.006137	0.00908	99.79	0.0000827	0.000116
D_0__Archaea;D_1__Aenigmarchaeota;D_2__Deep Sea Euryarchaeotic Group(DSEG);D_3__uncultured archaeon;D_4__uncultured archaeon;D_5__uncultured archaeon	0.00613	0.009068	99.8	0.0000491	0.000157
D_0__Bacteria;D_1__Actinobacteria;D_2__Actinobacteria;D_3__Actinomycetales;D_4__Actinomycetaceae;D_5__Actinomyces	0.005994	0.008867	99.81	0.000122	0.0000647
D_0__Bacteria;D_1__Actinobacteria;D_2__Actinobacteria;D_3__Micrococcales;D_4__Intrasporangiaceae;Other	0.005947	0.008798	99.82	0.0000297	0.000145
D_0__Bacteria;D_1__Acidobacteria;D_2__Solibacteres;D_3__Solibacterales;D_4__Solibacteraceae (Subgroup 3);D_5__AKIW659	0.005789	0.008564	99.83	0.000087	0.000139
D_0__Bacteria;D_1__Actinobacteria;D_2__Actinobacteria;D_3__Corynebacteriales;D_4__Corynebacteriaceae;D_5__uncultured	0.005666	0.008383	99.83	0.000031	0.000136
D_0__Bacteria;D_1__Chloroflexi;D_2__Dehalococcoidia;D_3__GIF3;Other;Other	0.005551	0.008212	99.84	0.000127	0.0000272
D_0__Bacteria;D_1__Actinobacteria;D_2__Acidimicrobiia;D_3__Acidimicrobiales;D_4__Acidimicrobiaceae;D_5__uncultured	0.005373	0.007949	99.85	0.000025	0.00013
D_0__Bacteria;D_1__Proteobacteria;D_2__Gammaproteobacteria;D_3__Enterobacteriales;D_4__Enterobacteriaceae;D_5__Escherichia-Shigella	0.005219	0.007722	99.86	0.000438	0.000458
D_0__Bacteria;D_1__Chloroflexi;D_2__Dehalococcoidia;D_3__Dehalococcoidales;D_4__uncultured;Other	0.005129	0.007588	99.87	0.000115	0.0000147
D_0__Bacteria;D_1__Aminicenantes;D_2__uncultured bacterium;D_3__uncultured bacterium;D_4__uncultured bacterium;D_5__uncultured bacterium	0.005066	0.007494	99.87	0.000194	0.000179
D_0__Bacteria;D_1__Chloroflexi;D_2__Anaerolineae;D_3__Anaerolineales;D_4__Anaerolineaceae;Other	0.004813	0.00712	99.88	0.000108	0.000119
D_0__Bacteria;D_1__Firmicutes;D_2__Bacilli;D_3__Lactobacillales;D_4__Streptococcaceae;D_5__Streptococcus	0.004574	0.006767	99.89	0.0000479	0.000091
D_0__Bacteria;D_1__Planctomycetes;D_2__Phycisphaerae;D_3__Phycisphaerales;Other;Other	0.004224	0.006249	99.89	0.000078	0.000127
D_0__Bacteria;D_1__Proteobacteria;D_2__Deltaproteobacteria;D_3__Syntrophobacterales;D_4__Syntrophaceae;D_5__Smithella	0.004221	0.006245	99.9	0.000148	0.0000823
D_0__Bacteria;D_1__Actinobacteria;D_2__OPB41;Ambiguous_taxa;Ambiguous_taxa;Ambiguous_taxa	0.00412	0.006095	99.91	0.000101	0.000039
D_0__Bacteria;D_1__Proteobacteria;D_2__Betaproteobacteria;D_3__Methylophilales;D_4__Methylophilaceae;D_5__uncultured	0.004093	0.006055	99.91	0.0000833	0.0000477
D_0__Bacteria;D_1__Candidatus Berkelbacteria;D_2__uncultured bacterium;D_3__uncultured bacterium;D_4__uncultured bacterium;D_5__uncultured bacterium	0.004088	0.006047	99.92	0.000103	0.0000496
D_0__Bacteria;D_1__Proteobacteria;D_2__Alphaproteobacteria;D_3__Rhizobiales;D_4__Phyllobacteriaceae;D_5__Mesorhizobium	0.003797	0.005618	99.92	0.000105	0.0000399
D_0__Bacteria;D_1__Chloroflexi;D_2__Anaerolineae;D_3__Anaerolineales;D_4__Anaerolineaceae;D_5__Bellilinea	0.003739	0.005532	99.93	0.000105	0.0000319
D_0__Bacteria;D_1__Microgenomates;D_2__Candidatus Woesebacteria;Other;Other;Other	0.003601	0.005327	99.93	0.0000125	0.0000778
D_0__Bacteria;D_1__Ignavibacteriae;D_2__Ignavibacteria;D_3__Ignavibacteriales;D_4__PHOS-HE36;D_5__uncultured bacterium	0.003079	0.004555	99.94	0.0000773	0.0000269
D_0__Bacteria;D_1__Bacteroidetes;D_2__Bacteroidetes BD2-2;D_3__uncultured Cytophagales bacterium;D_4__uncultured Cytophagales bacterium;D_5__uncultured Cytophagales bacterium	0.003049	0.004511	99.94	0.0000935	0.0000392
D_0__Bacteria;D_1__Chloroflexi;D_2__Anaerolineae;D_3__Anaerolineales;D_4__Anaerolineaceae;D_5__Pelolinea	0.002993	0.004428	99.95	0.0000909	0.0000409
D_0__Bacteria;D_1__Proteobacteria;D_2__Gammaproteobacteria;D_3__Legionellales;D_4__Coxiellaceae;D_5__Rickettsiella	0.002847	0.004212	99.95	0.0000765	0.0000457
D_0__Bacteria;D_1__Actinobacteria;D_2__Actinobacteria;D_3__Micrococcales;D_4__Micrococcaceae;D_5__Micrococcus	0.002701	0.003995	99.96	0.0000284	0.0000584
D_0__Bacteria;D_1__Proteobacteria;D_2__Alphaproteobacteria;D_3__Rhodospirillales;D_4__Rhodospirillaceae;D_5__uncultured	0.002595	0.003839	99.96	0.0000233	0.0000616
D_0__Bacteria;D_1__Parcubacteria;D_2__uncultured bacterium;D_3__uncultured bacterium;D_4__uncultured bacterium;D_5__uncultured bacterium	0.002551	0.003774	99.96	0.0000631	0.0000263
D_0__Bacteria;D_1__Chlorobi;D_2__Chlorobia;D_3__Chlorobiales;D_4__OPB56;D_5__uncultured bacterium	0.002483	0.003673	99.97	0.0000707	0.0000442
D_0__Bacteria;D_1__Microgenomates;D_2__Candidatus Woesebacteria;D_3__uncultured Microgenomates group bacterium;D_4__uncultured Microgenomates group bacterium;D_5__uncultured Microgenomates group bacterium	0.002315	0.003424	99.97	0.000063	0.0000779
D_0__Bacteria;D_1__Lentisphaerae;D_2__Oligosphaeria;D_3__Oligosphaerales;D_4__MVP-94;Other	0.002199	0.003253	99.97	0.0000503	0.0000206
D_0__Bacteria;D_1__Proteobacteria;D_2__Betaproteobacteria;D_3__Burkholderiales;D_4__Comamonadaceae;D_5__Comamonas	0.002127	0.003147	99.98	0.0000656	0.000081
D_0__Bacteria;D_1__Chloroflexi;D_2__Dehalococcoidia;D_3__FS117-23B-02;D_4__uncultured bacterium;D_5__uncultured bacterium	0.001857	0.002748	99.98	0.0000528	0.0000346
D_0__Bacteria;D_1__Planctomycetes;D_2__Phycisphaerae;D_3__Tepidisphaerales;D_4__Tepidisphaeraceae;Other	0.001803	0.002667	99.98	0.0000627	0.0000363
D_0__Bacteria;D_1__Planctomycetes;D_2__Phycisphaerae;D_3__ODP1230B30.09;Other;Other	0.001756	0.002598	99.99	0.0000492	0.000025
D_0__Bacteria;D_1__Fibrobacteres;D_2__Fibrobacteria;D_3__Fibrobacterales;D_4__possible family 01;D_5__uncultured microorganism	0.001535	0.002271	99.99	0.0000589	0.0000554
D_0__Bacteria;D_1__Bacteroidetes;D_2__Bacteroidetes vadinHA17;D_3__uncultured Bacteroidales bacterium;D_4__uncultured Bacteroidales bacterium;D_5__uncultured Bacteroidales bacterium	0.001392	0.002059	99.99	0.0000458	0.000036
D_0__Bacteria;D_1__Omnitrophica;D_2__uncultured bacterium;D_3__uncultured bacterium;D_4__uncultured bacterium;D_5__uncultured bacterium	0.001324	0.001958	99.99	0.0000445	0.0000255
D_0__Bacteria;D_1__Parcubacteria;D_2__Candidatus Falkowbacteria;D_3__uncultured Parcubacteria group bacterium;D_4__uncultured Parcubacteria group bacterium;D_5__uncultured Parcubacteria group bacterium	0.001095	0.001619	99.99	0.0000338	0.0000144
D_0__Bacteria;D_1__FCPU426;D_2__uncultured bacterium;D_3__uncultured bacterium;D_4__uncultured bacterium;D_5__uncultured bacterium	0.001083	0.001602	100	0.0000352	0.0000235
D_0__Bacteria;D_1__GN01;D_2__uncultured bacterium;D_3__uncultured bacterium;D_4__uncultured bacterium;D_5__uncultured bacterium	0.0009239	0.001367	100	0.0000309	0.0000171
D_0__Bacteria;D_1__Bacteroidetes;D_2__SB-5;D_3__uncultured organism;D_4__uncultured organism;D_5__uncultured organism	0.0008596	0.001272	100	0.00003	0.0000172
D_0__Bacteria;D_1__Elusimicrobia;D_2__Elusimicrobia;D_3__HydGH-Bac75;D_4__uncultured bacterium;D_5__uncultured bacterium	0.0007813	0.001156	100	0.0000285	0.0000218
D_0__Bacteria;D_1__Fibrobacteres;D_2__Fibrobacteria;D_3__Fibrobacterales;D_4__B122;D_5__uncultured bacterium	0.0006522	0.0009648	100	0.0000239	0.0000166
